# Supplementary material for: Cortical idiosyncrasies predict the perception of object size
Source: PubMed Central journal article supplement (PMC4931347; doi:10.1038/ncomms12110), 2016-06-30
Supplement: ncomms12110-s1.pdf [file ncomms12110-s1.pdf]

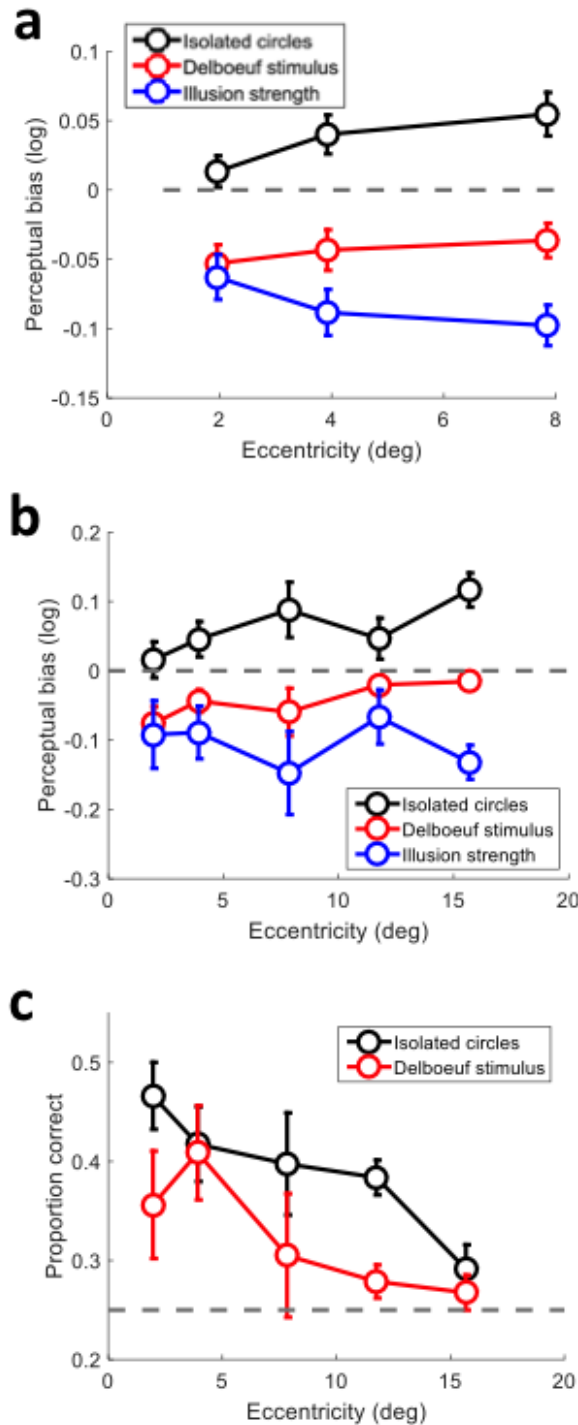

1

2 **Supplementary Figure 1. a.** Average perceptual bias (positive and negative: target appears smaller  
3 or larger than reference, respectively) weighted by the acuity (reciprocal of squared dispersion),  
4 across individuals plotted against target eccentricity for simple isolated circles (black), contextual  
5 Delboeuf stimuli (red), and relative illusion strength (blue), that is, the difference in biases measured  
6 for the two stimulus conditions. Data from all 10 observers in the size eccentricity bias experiment.  
7 **b.** Data from 4 observers in the size far-eccentricity bias experiment. **c.** Behavioral accuracy on the  
8 task for the 4 observers in the size far-eccentricity bias experiment. Chance was 25% and is noted by  
9 the dashed grey line. In all plots, error bars denote  $\pm 1$  standard error of the mean.

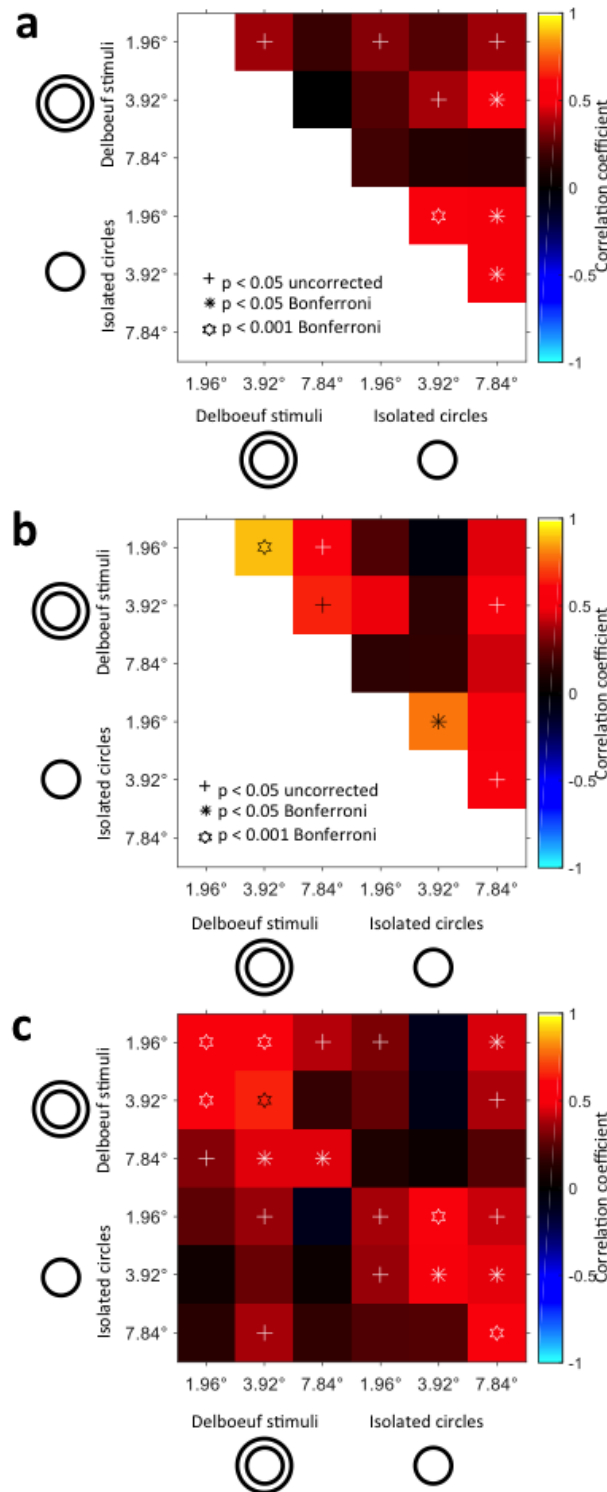

10

11 **Supplementary Figure 2.** Correlation matrices showing the relationship between the perceptual  
 12 biases in the two conditions (isolated circles and Delboeuf stimuli) and at the three stimulus  
 13 eccentricities. **a.** Correlations after removing between-subject variance, i.e. the mean across the  
 14 biases for the four targets was subtracted from each condition. **b.** Correlations after removing the  
 15 within-subject variance, i.e. biases were averaged across the four targets in each condition. **c.**  
 16 Correlations between the first and second session of the experiment conducted on different days. All  
 17 other conventions as in Figure 1e. Note that statistical power in **b** is lower relative to the other  
 18 figures, because after averaging there is only a quarter of the number of observations.

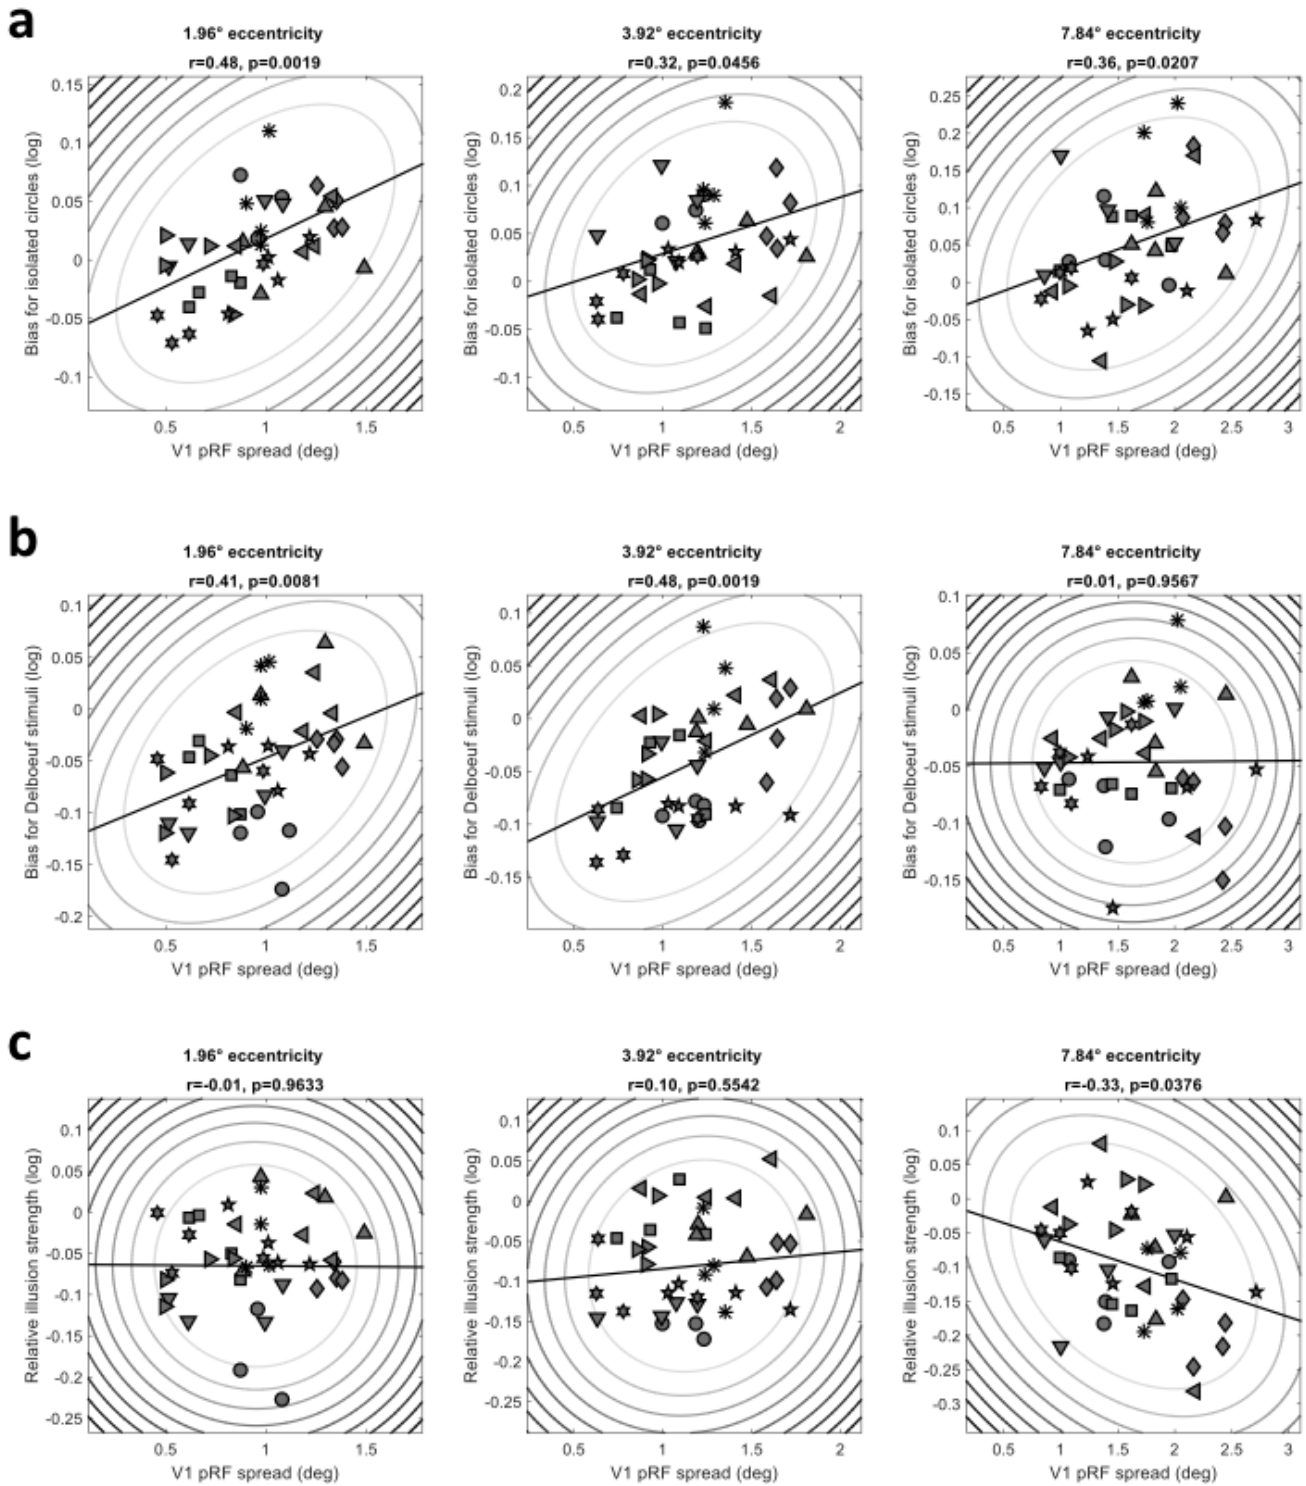

20 **Supplementary Figure 3.** Perceptual biases for isolated circles (**a**), for the Delboeuf stimuli (**b**), and  
 21 the relative illusion strength (**c**), that is, the bias for Delboeuf stimuli minus the bias for isolated  
 22 circles, plotted against pRF spread at the corresponding location in V1 for each observer and  
 23 stimulus location. Columns show data for stimuli at 1.96°, 3.92°, or 7.84° eccentricity. Symbols  
 24 denote individual observers. Elliptic contours denote the Mahalanobis distance from the bivariate  
 25 mean. The straight, black lines denote the linear regression.

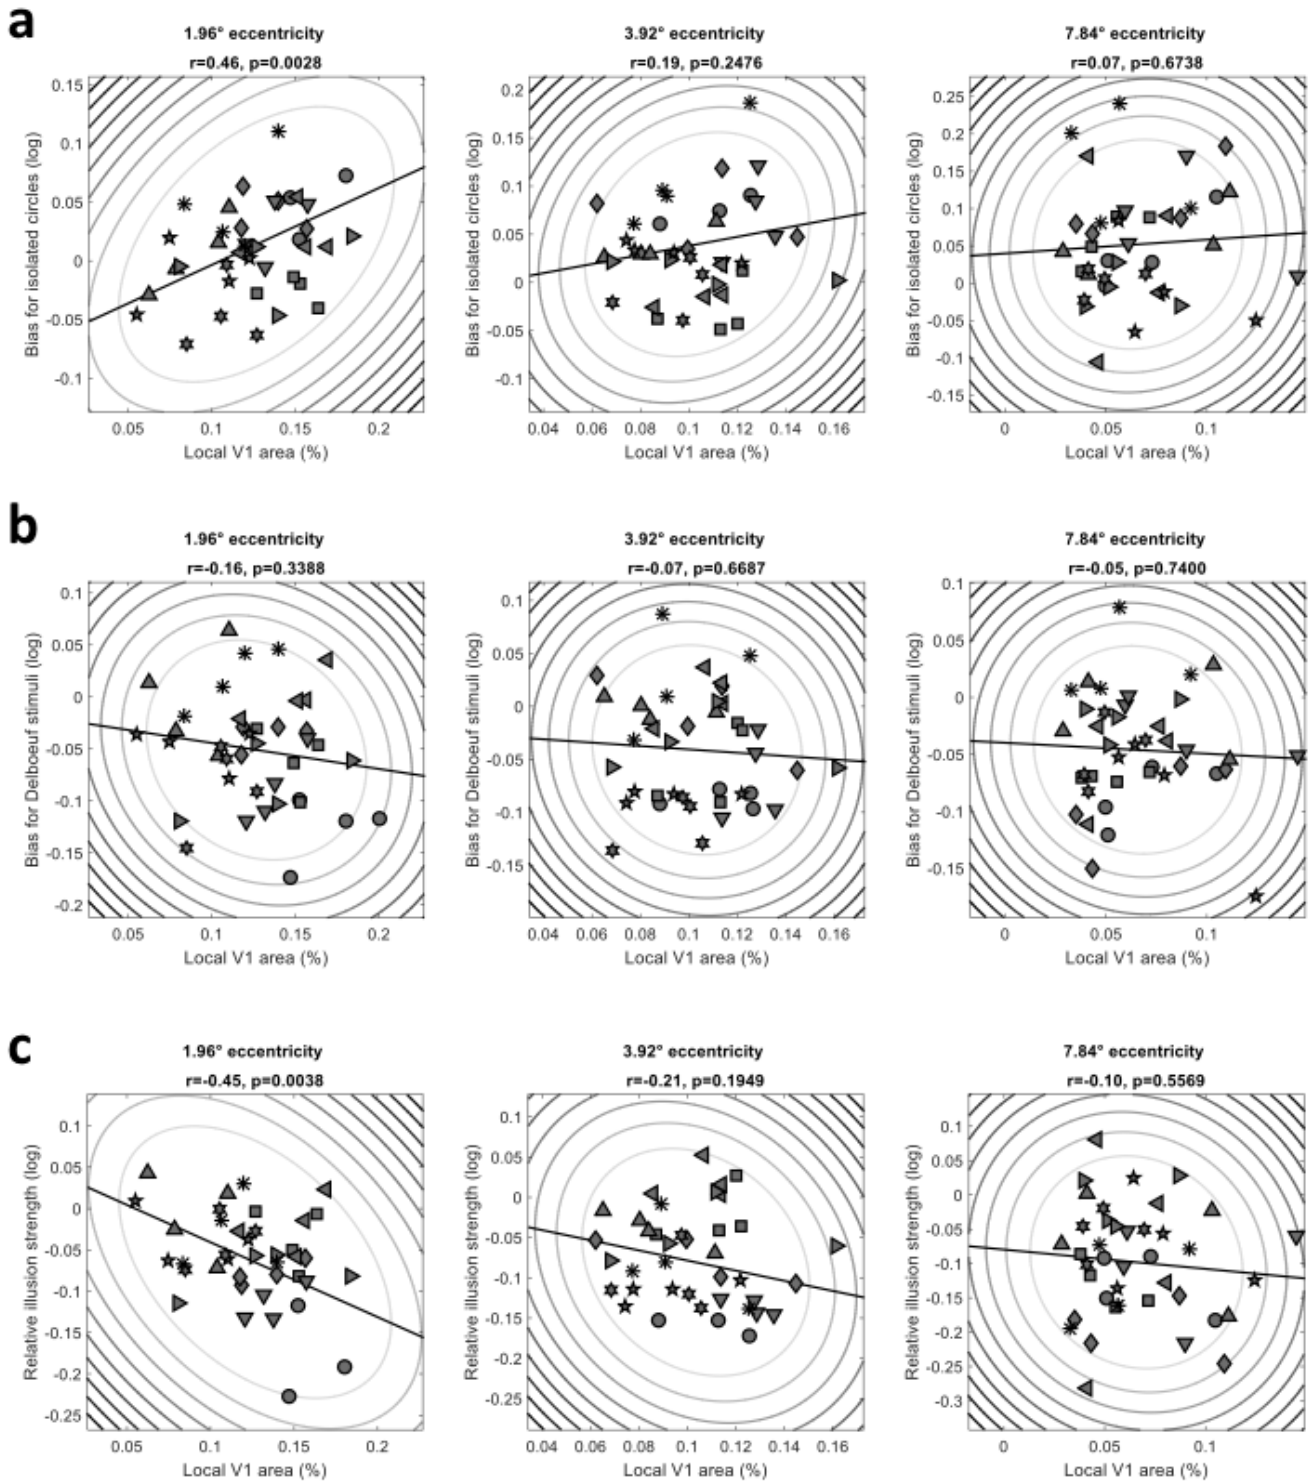

27 **Supplementary Figure 4.** Perceptual biases for isolated circles (**a**), for the Delboeuf stimuli (**b**), and  
 28 the relative illusion strength (**c**), that is, the bias for Delboeuf stimuli minus the bias for isolated  
 29 circles, plotted against the surface area of the corresponding location in V1 for each observer and  
 30 stimulus location (as percentage of the area of the whole cortical hemisphere). Columns show data  
 31 for stimuli at 1.96°, 3.92°, or 7.84° eccentricity. Symbols denote individual observers. Elliptic  
 32 contours denote the Mahalanobis distance from the bivariate mean. The straight, black lines denote  
 33 the linear regression.

| Pooled eccentricities               | V1 pRF spread vs                  |                                   |                                     |
|-------------------------------------|-----------------------------------|-----------------------------------|-------------------------------------|
|                                     | <i>Isolated circles</i>           | <i>Delboeuf stimuli</i>           | <i>Illusion index</i>               |
| <i>Pooled data (main analysis)</i>  | R = 0.43, p < 0.001, n = 120      | R = 0.21, p = 0.022, n = 120      | R = -0.22, p = 0.017, n = 120       |
| <i>Within-subject variance only</i> | R = 0.29, p = 0.001, n = 120      | R = 0.15, p = 0.112, n = 120      | R = -0.16, p = 0.077, n = 120       |
| <i>Second-level analysis</i>        | R = 0.41, t(29) = 2.81, p = 0.009 | R = 0.25, t(29) = 1.54, p = 0.135 | R = -0.06, t(29) = -0.37, p = 0.714 |
| 1.96° eccentricity                  | V1 pRF spread vs                  |                                   |                                     |
|                                     | <i>Isolated circles</i>           | <i>Delboeuf stimuli</i>           | <i>Illusion index</i>               |
| <i>Pooled data (main analysis)</i>  | R = 0.48, p = 0.002, n = 40       | R = 0.41, p = 0.008, n = 40       | R = -0.01, p = 0.963, n = 40        |
| <i>Within-subject variance only</i> | R = 0.37, p = 0.018, n = 40       | R = 0.19, p = 0.231, n = 40       | R = -0.16, p = 0.325, n = 40        |
| <i>Second-level analysis</i>        | R = 0.57, t(9) = 1.96, p = 0.082  | R = 0.10, t(9) = 0.35, p = 0.735  | R = -0.27, t(9) = -0.90, p = 0.391  |
| 3.92° eccentricity                  | V1 pRF spread vs                  |                                   |                                     |
|                                     | <i>Isolated circles</i>           | <i>Delboeuf stimuli</i>           | <i>Illusion index</i>               |
| <i>Pooled data (main analysis)</i>  | R = 0.32, p = 0.046, n = 40       | R = 0.48, p = 0.002, n = 40       | R = 0.10, p = 0.554, n = 40         |
| <i>Within-subject variance only</i> | R = 0.21, p = 0.196, n = 40       | R = 0.23, p = 0.146, n = 40       | R = -0.02, p = 0.917, n = 40        |
| <i>Second-level analysis</i>        | R = 0.41, t(9) = 2.30, p = 0.047  | R = 0.40, t(9) = 1.52, p = 0.163  | R = 0.11, t(9) = 0.39, p = 0.705    |
| 7.84° eccentricity                  | V1 pRF spread vs                  |                                   |                                     |
|                                     | <i>Isolated circles</i>           | <i>Delboeuf stimuli</i>           | <i>Illusion index</i>               |
| <i>Pooled data (main analysis)</i>  | R = 0.36, p = 0.021, n = 40       | R = 0.01, p = 0.957, n = 40       | R = -0.33, p = 0.038, n = 40        |
| <i>Within-subject variance only</i> | R = 0.29, p = 0.066, n = 40       | R = 0.10, p = 0.546, n = 40       | R = -0.21, p = 0.203, n = 40        |
| <i>Second-level analysis</i>        | R = 0.21, t(9) = 0.78, p = 0.456  | R = 0.24, t(9) = 0.76, p = 0.467  | R = 0.00, t(9) = 0.01, p = 0.988    |

34

35 **Supplementary Table 1.** All correlations between pRF spread in V1 and perceptual bias measures  
36 using four complementary analysis approaches: ‘Pooled data’ refers to the main analysis presented  
37 in which we simply treated each of the 12 visual field locations per observer as an separate data  
38 point. ‘Within-subject variance only’ refers to the equivalent analysis after removing the mean pRF  
39 spread and perceptual bias, respectively, across the four locations for each eccentricity and  
40 observer. ‘Second-level analysis’ refers to the analysis in which we first calculated the correlation  
41 across four locations separately for each observer and eccentricity and then determined whether  
42 the average correlation (after z-transformation) was different from zero. Both, the average  
43 correlation coefficient and the statistics of the t-test against zero are shown. Only the full  
44 combination of all four visual field locations per observer and eccentricity are used. Across the table,  
45 cells shaded in grey denote correlations statistically significant at p<0.05.

46

| Pooled eccentricities               | V1 surface area vs                |                                   |                                     |
|-------------------------------------|-----------------------------------|-----------------------------------|-------------------------------------|
|                                     | <i>Isolated circles</i>           | <i>Delboeuf stimuli</i>           | <i>Illusion index</i>               |
| <i>Pooled data (main analysis)</i>  | R = -0.00, p = 0.965, n = 120     | R = -0.09, p = 0.315, n = 120     | R = -0.06, p = 0.507, n = 120       |
| <i>Within-subject variance only</i> | R = 0.21, p = 0.022, n = 120      | R = 0.13, p = 0.167, n = 120      | R = -0.10, p = 0.254, n = 120       |
| <i>Second-level analysis</i>        | R = 0.44, t(29) = 2.63, p = 0.014 | R = 0.31, t(29) = 1.97, p = 0.059 | R = -0.11, t(29) = -0.73, p = 0.470 |
| 1.96° eccentricity                  | V1 surface area vs                |                                   |                                     |
|                                     | <i>Isolated circles</i>           | <i>Delboeuf stimuli</i>           | <i>Illusion index</i>               |
| <i>Pooled data (main analysis)</i>  | R = 0.46, p = 0.003, n = 40       | R = -0.16, p = 0.339, n = 40      | R = -0.45, p = 0.004, n = 40        |
| <i>Within-subject variance only</i> | R = 0.43, p = 0.005, n = 40       | R = 0.38, p = 0.017, n = 40       | R = -0.06, p = 0.708, n = 40        |
| <i>Second-level analysis</i>        | R = 0.47, t(9) = 2.22, p = 0.054  | R = 0.59, t(9) = 2.44, p = 0.037  | R = 0.21, t(9) = 0.89, p = 0.395    |
| 3.92° eccentricity                  | V1 surface area vs                |                                   |                                     |
|                                     | <i>Isolated circles</i>           | <i>Delboeuf stimuli</i>           | <i>Illusion index</i>               |
| <i>Pooled data (main analysis)</i>  | R = 0.19, p = 0.248, n = 40       | R = -0.07, p = 0.669, n = 40      | R = -0.21, p = 0.195, n = 40        |
| <i>Within-subject variance only</i> | R = 0.25, p = 0.116, n = 40       | R = 0.03, p = 0.847, n = 40       | R = -0.22, p = 0.177, n = 40        |
| <i>Second-level analysis</i>        | R = 0.47, t(9) = 1.19, p = 0.265  | R = 0.17, t(9) = 0.84, p = 0.423  | R = -0.39, t(9) = -1.25, p = 0.244  |
| 7.84° eccentricity                  | V1 surface area vs                |                                   |                                     |
|                                     | <i>Isolated circles</i>           | <i>Delboeuf stimuli</i>           | <i>Illusion index</i>               |
| <i>Pooled data (main analysis)</i>  | R = 0.07, p = 0.674, n = 40       | R = -0.05, p = 0.740, n = 40      | R = -0.10, p = 0.557, n = 40        |
| <i>Within-subject variance only</i> | R = 0.09, p = 0.584, n = 40       | R = -0.01, p = 0.957, n = 40      | R = -0.08, p = 0.618, n = 40        |
| <i>Second-level analysis</i>        | R = 0.37, t(9) = 1.46, p = 0.178  | R = 0.10, t(9) = 0.30, p = 0.775  | R = -0.13, t(9) = -0.76, p = 0.466  |

47

48 **Supplementary Table 2.** All correlations between cortical surface area in V1 and perceptual bias  
49 measures using four complementary analysis approaches: ‘Pooled data’ refers to the main analysis  
50 presented in which we simply treated each of the 12 visual field locations per observer as an  
51 separate data point. ‘Within-subject variance only’ refers to the equivalent analysis after removing  
52 the mean cortical surface area and perceptual bias, respectively, across the four locations for each  
53 eccentricity and observer. ‘Second-level analysis’ refers to the analysis in which we first calculated  
54 the correlation across four locations separately for each observer and eccentricity and then  
55 determined whether the average correlation (after z-transformation) was different from zero. Both,  
56 the average correlation coefficient and the statistics of the t-test against zero are shown. Only the  
57 full combination of all four visual field locations per observer and eccentricity are used. Across the  
58 table, cells shaded in grey denote correlations statistically significant at  $p < 0.05$ .

59

60

61

## 62 **Supplementary Note 1**

### 63 Reliability of perceptual bias estimates

64 We further confirmed the reliability of these bias estimates by comparing estimates from two  
65 sessions conducted on different days (Supplementary Figure 2c). Moreover, 9 of our observers were  
66 tested twice, with approximately one year between sessions. Despite the long time between  
67 experiments and variation in the stimulus sampling procedure (see Methods), estimates of  
68 perceptual biases at target eccentricity  $3.92^\circ$  (which was common to both experiments) were  
69 correlated (Pearson's  $r=0.35$ ,  $p=0.0373$ ,  $n=36$ ). This correlation was largely driven by the within-  
70 subject variance, and was considerably greater after subtracting the mean across the four target  
71 locations for every condition ( $r=0.58$ ,  $p=0.0002$ ,  $n=36$ ). In contrast, removing the within-subject  
72 variance by averaging bias estimates across the four targets reduced the correlation substantially  
73 ( $r=0.18$ ,  $p=0.6483$ ,  $n=36$ ). Finally, 4 observers repeated the experiment two years after the initial  
74 experiment, allowing us to compare biases for the three eccentricities tested in the original  
75 experiment ( $n=48$ ). We again found a strong reliability of idiosyncratic biases ( $r=0.47$ ,  $p=0.001$ ,  $n=48$ ;  
76 after removing between-subject variance:  $r=0.71$ ,  $p<0.001$ ,  $n=48$ ).

77

## 78 **Supplementary Note 2**

### 79 Intra-individual differences analysis

80 For each observer we obtained separate measures of perceptual bias and cortical measures  
81 corresponding to 12 visual field locations. We then calculated correlations by comparing all locations  
82 (120 data points) or across quadrants but separately for each eccentricity (40 data points). Naturally,  
83 multiple observations for a given participant are not strictly independent. Therefore, as described in  
84 the main text we performed three parallel analyses:

- 85 1. Pooled data (all variance): The main analyses reported in our study simply show the pooled  
86 data without any additional processing. They therefore compare the 120 (or 40, when  
87 separating eccentricities) data points with each visual field location as a separate data point  
88 (Figure 2 c-e; Figure 5). This approach is the most inclusive as it incorporates both the  
89 within-subject variance (the pattern of variability across visual field locations) as well as the  
90 conventional between-subject variance (differences between individual observers that affect  
91 all visual field locations in a given observer equally). Our hypothesis that cortical  
92 idiosyncrasies in pRF spread/surface area relate to perceptual biases suggests that both  
93 between- and within-subject variance should contribute similarly to the correlation.

- 94 2. Within-subject variance only: We also calculated correlations after removing the between-  
95 subject variance by first subtracting the mean of measurements across the four visual field  
96 locations from each eccentricity and observer. This way the correlation only takes into  
97 account the variability across quadrants within each observer/eccentricity.
- 98 3. Second-level analysis of within-subject variance: In an alternative analysis using only the  
99 within-subject variance we calculated the correlation between the two variables separately  
100 for each eccentricity and each observer, and then determined whether the average  
101 correlation (after Fisher's z-transformation to linearize  $r$ ) is significantly different from zero  
102 using a one-sample t-test. However, this approach is comparably underpowered because it  
103 relies on only four data points (one per visual field quadrant) for each observer and  
104 eccentricity. Thus, each individual correlation coefficient is likely to be skewed by outliers or  
105 individual unreliable measurements and this approach is prone to both type I and type II  
106 error.

107

### 108 **Supplementary Note 3**

#### 109 Power analysis

110 To confirm the validity of our analysis approach, we conducted simulations to determine its  
111 statistical power. In 10,000 simulations we generated random data sets with the same sample sizes  
112 and dimensionality of our data to test three situations: A) Complete null hypothesis: the two  
113 variables were completely uncorrelated. B) Complete alternative hypothesis: The 120 data points  
114 were chosen from the same underlying distribution with a population correlation of 0.3. This is the  
115 alternative hypothesis we seek to test in this study, because it assumes that variability in cortical  
116 measures (pRF spread or cortical surface area) is directly linked to perceptual biases. C) Between-  
117 subject relationship only: two variables of 10 subjects with 12 stimulus locations were correlated  
118 (using population correlation of 0.3) but the within-subject variance was random noise (Gaussian  
119 noise with 0.5 standard deviations) added to the 4 observations for each observer and eccentricity.  
120 This situation assumes the effect is solely driven by the between-subject variance and within-subject  
121 variance is merely measurement noise within each observer.

122 These simulations showed that analyses 1 and 3 (see Supplementary Note 2) have nominal levels of  
123 false positives (~5%) when the null hypothesis is true (situation A), but analysis 2 (within-subject  
124 variance only) somewhat inflates false positive rates to around 9%. Conversely, for situation B when  
125 the alternative hypothesis is true and there is a direct relationship between the two variables,  
126 analyses 1 and 2 are most sensitive with a statistical power of approximately 92% and 89%,



127 respectively. Analysis 3 was far less sensitive (65% power). Finally, in situation C when the  
128 relationship is only driven by the between-subject variance, statistical power for analysis 1 is still  
129 moderately high (65%) but as expected power for all the analyses is much lower (9% for analysis 2,  
130 respectively, and at the alpha level of 5% for analysis 3). Thus if our hypothesis of a direct link of the  
131 within-subject variability in perceptual biases and V1 measures were untrue and the relationship  
132 was mainly driven by between-subject variance, we would have been unlikely to detect any  
133 correlations in these control analyses. This is clearly not the case as the pattern of results is  
134 qualitatively very similar between the four analyses in most cases – especially the main result  
135 comparing pRF spread to perceptual biases of isolate circles is highly significant in all four analyses  
136 (Supplementary Tables 1 and 2).

137

138
